# Supplementary material for: Optimized two‐step electroporation process to achieve efficient nonviral‐mediated gene insertion into primary T cells
Source: PubMed Central journal article supplement (PMC8727936; doi:10.1002/2211-5463.13292), 2021-10-01

## Supporting information

Table S1. Primers and Oligos

|                                         |                     |                                                                                                                                                                                   |
|-----------------------------------------|---------------------|-----------------------------------------------------------------------------------------------------------------------------------------------------------------------------------|
| <i>DSB primers</i>                      | <b>B2M down_L</b>   | CATTCTGAAGCTGACAGCATTCGGG                                                                                                                                                         |
|                                         | <b>B2M down_R</b>   | GGGTAGGAGAGACTCACGCTGGATAG                                                                                                                                                        |
|                                         | <b>B2M cross_L</b>  | CGTGACTTCCCTTCTCCAAGTTCTCC                                                                                                                                                        |
|                                         | <b>B2M cross_R</b>  | ACGCTTATCGACGCCCTAAACTTTGT                                                                                                                                                        |
|                                         | <b>TRAC up_L</b>    | GCATTTCAGGTTTCCTTGAGTGCCAG                                                                                                                                                        |
|                                         | <b>TRAC up_R</b>    | TGGCAAGTCACGGTCTCATGCTTTAT                                                                                                                                                        |
|                                         | <b>TRAC cross_L</b> | CTTGTCATCACTGGCATCTGGACTC                                                                                                                                                         |
|                                         | <b>TRAC cross_R</b> | ATCGGTGAATAGGCAGACAGACTTGT                                                                                                                                                        |
| <i>qPCR primers for dsDNA Half-life</i> | <b>Actin_L</b>      | GCTGTTCCAGGCTCTGTTCC                                                                                                                                                              |
|                                         | <b>Actin_R</b>      | ATGCTCACACGCCACAACATGC                                                                                                                                                            |
|                                         | <b>CAR_L</b>        | GAATTGGATCAGGCAGTCCCCTTCTC                                                                                                                                                        |
|                                         | <b>CAR_R</b>        | TGTGATTCTGCTCTTCACAGACACGG                                                                                                                                                        |
| <i>NGS primers</i>                      | <b>B2M_L</b>        | CTACACGACGCTCTCCGATCTGTCCCTCTCTAACCTGGC                                                                                                                                           |
|                                         | <b>B2M_R</b>        | GTGACTGGAGTTCAGACGTGTGCTCTCCGATCTGAAGGGAAGTCACGGAGCGA                                                                                                                             |
|                                         | <b>TRAC_L</b>       | GTCGACTAGGGATAACAGGGTAATTATCCAGAACCCTGACCCTGCCGTGTACCA                                                                                                                            |
|                                         | <b>TRAC_R</b>       | AAACTGTATTATAAGTAAATGCATTGGATTTAGAGTCTCTCAGCTGGTACACGG                                                                                                                            |
| <i>ssODN</i>                            |                     | CCTGGGTTGGGGCAAAGAGGGAAATGAGATCATGCTCAACCCTGATCCTCTTG<br>TCCCACAGATATCCAGAACCCTAGGTGAAAGCTTAGACTAGTGACCCTGCCGTGT<br>ACCAGCTGAGAGACTCTAAATCCAGTGACAAGTCTGTCTGCCTATTCACCGATTTTGATTC |
| <i>CAR template primers</i>             | <b>Template_L</b>   | C*C*C*A*GTCACGACGTTGTAAAACG                                                                                                                                                       |
|                                         | <b>Template_R</b>   | G*C*G*GATAACAATTCACACAGG                                                                                                                                                          |

\* phosphorothioate bond

Table S2. Information for antibodies used in this study

|  | <i>Target</i>                                          | <i>Fluorophore</i> | <i>Company</i>            | <i>Catalog #</i> | <i>Clone</i>      | <i>Dilution</i> |
|--|--------------------------------------------------------|--------------------|---------------------------|------------------|-------------------|-----------------|
|  | <i>Anti-rabbit IgG, HRP</i>                            |                    | Cell Signaling Technology | 7074             |                   | 1:10000         |
|  | <i>Actin</i>                                           |                    | Sigma                     | A3853            | AC-40, monoclonal | 1:1000          |
|  | <i>Anti-mouse IgG, HRP</i>                             |                    | Cell Signaling Technology | 7076             |                   | 1:10000         |
|  | <i>CD22Fc recombinant protein</i>                      |                    | Lake Pharma               |                  |                   | 1:200           |
|  | <i>Goat Anti-Mouse IgG (subclasses 1+2a+2b+3), Fcy</i> | PE                 | Jackson Lab               | 115-115-164      | polyclonal        | 1:200           |
|  | <i>Goat Anti-Mouse IgG, Fcy subclass 1 specific</i>    | BV421              | Jackson Lab               | 115-675-205      | polyclonal        | 1:300           |
|  | <i>CD3</i>                                             | APC                | Miltenyi                  | 130-113-125      | BW264/56          | 1:20            |
|  | <i>TCR-gd</i>                                          | PEVio770           | Miltenyi                  | 130-113-505      | 11F2              | 1:20            |

|               |                 |                |             |         |      |
|---------------|-----------------|----------------|-------------|---------|------|
| <i>PD1</i>    | BV510           | BD Biosciences | 563076      | EH12.1  | 1:25 |
| <i>LAG3</i>   | PerCP-eFlour710 | Invitrogen     | 46-2239-42  | 3DS223H | 1:25 |
| <i>CD45RA</i> | Vioblu          | Miltenyi       | 130-113-360 | T6D11   | 1:25 |
| <i>CD62L</i>  | PE              | Miltenyi       | 130-113-625 | REA615  | 1:25 |

## Supplementary Figure Legends

**Figure S1.** Expression of the CD22CAR in  $\gamma\delta$ T cells. Six days after transfection, the expression of TCR $\alpha\beta$ , TCR $\gamma\delta$  and CD22CAR was measured by flow cytometry. To the right, the CD22CAR expression was gated on the TCR $\gamma\delta^+$  population (red box). The TCR $\gamma\delta^-$  population (blue box) was further divided by their expression of CD22CAR and TCR $\alpha\beta$ .

**Figure S2.** T cell activation, differentiation and exhaustion after the two-step electroporation. A. Cytokine (IL6, IL10, IFN $\gamma$  and TNF $\alpha$ ) profile after electroporation of mRNA and/or dsDNA. Cells were cultured for 2 additional days before supernatant collection and analysis of cytokine expression by LEGENDPlex (N=3 independent donors, median and range). B. Expression of T cell differentiation markers after G-Rex for expansion and cryopreservation. Thawed cells from two donors were culture for 24hrs before staining for CD62L and CD45RA (N=2 independent donors). C. The same cells were stained for LAG3 and PD1 to detect the exhaustion markers (N=2 independent donors).

Figure S1

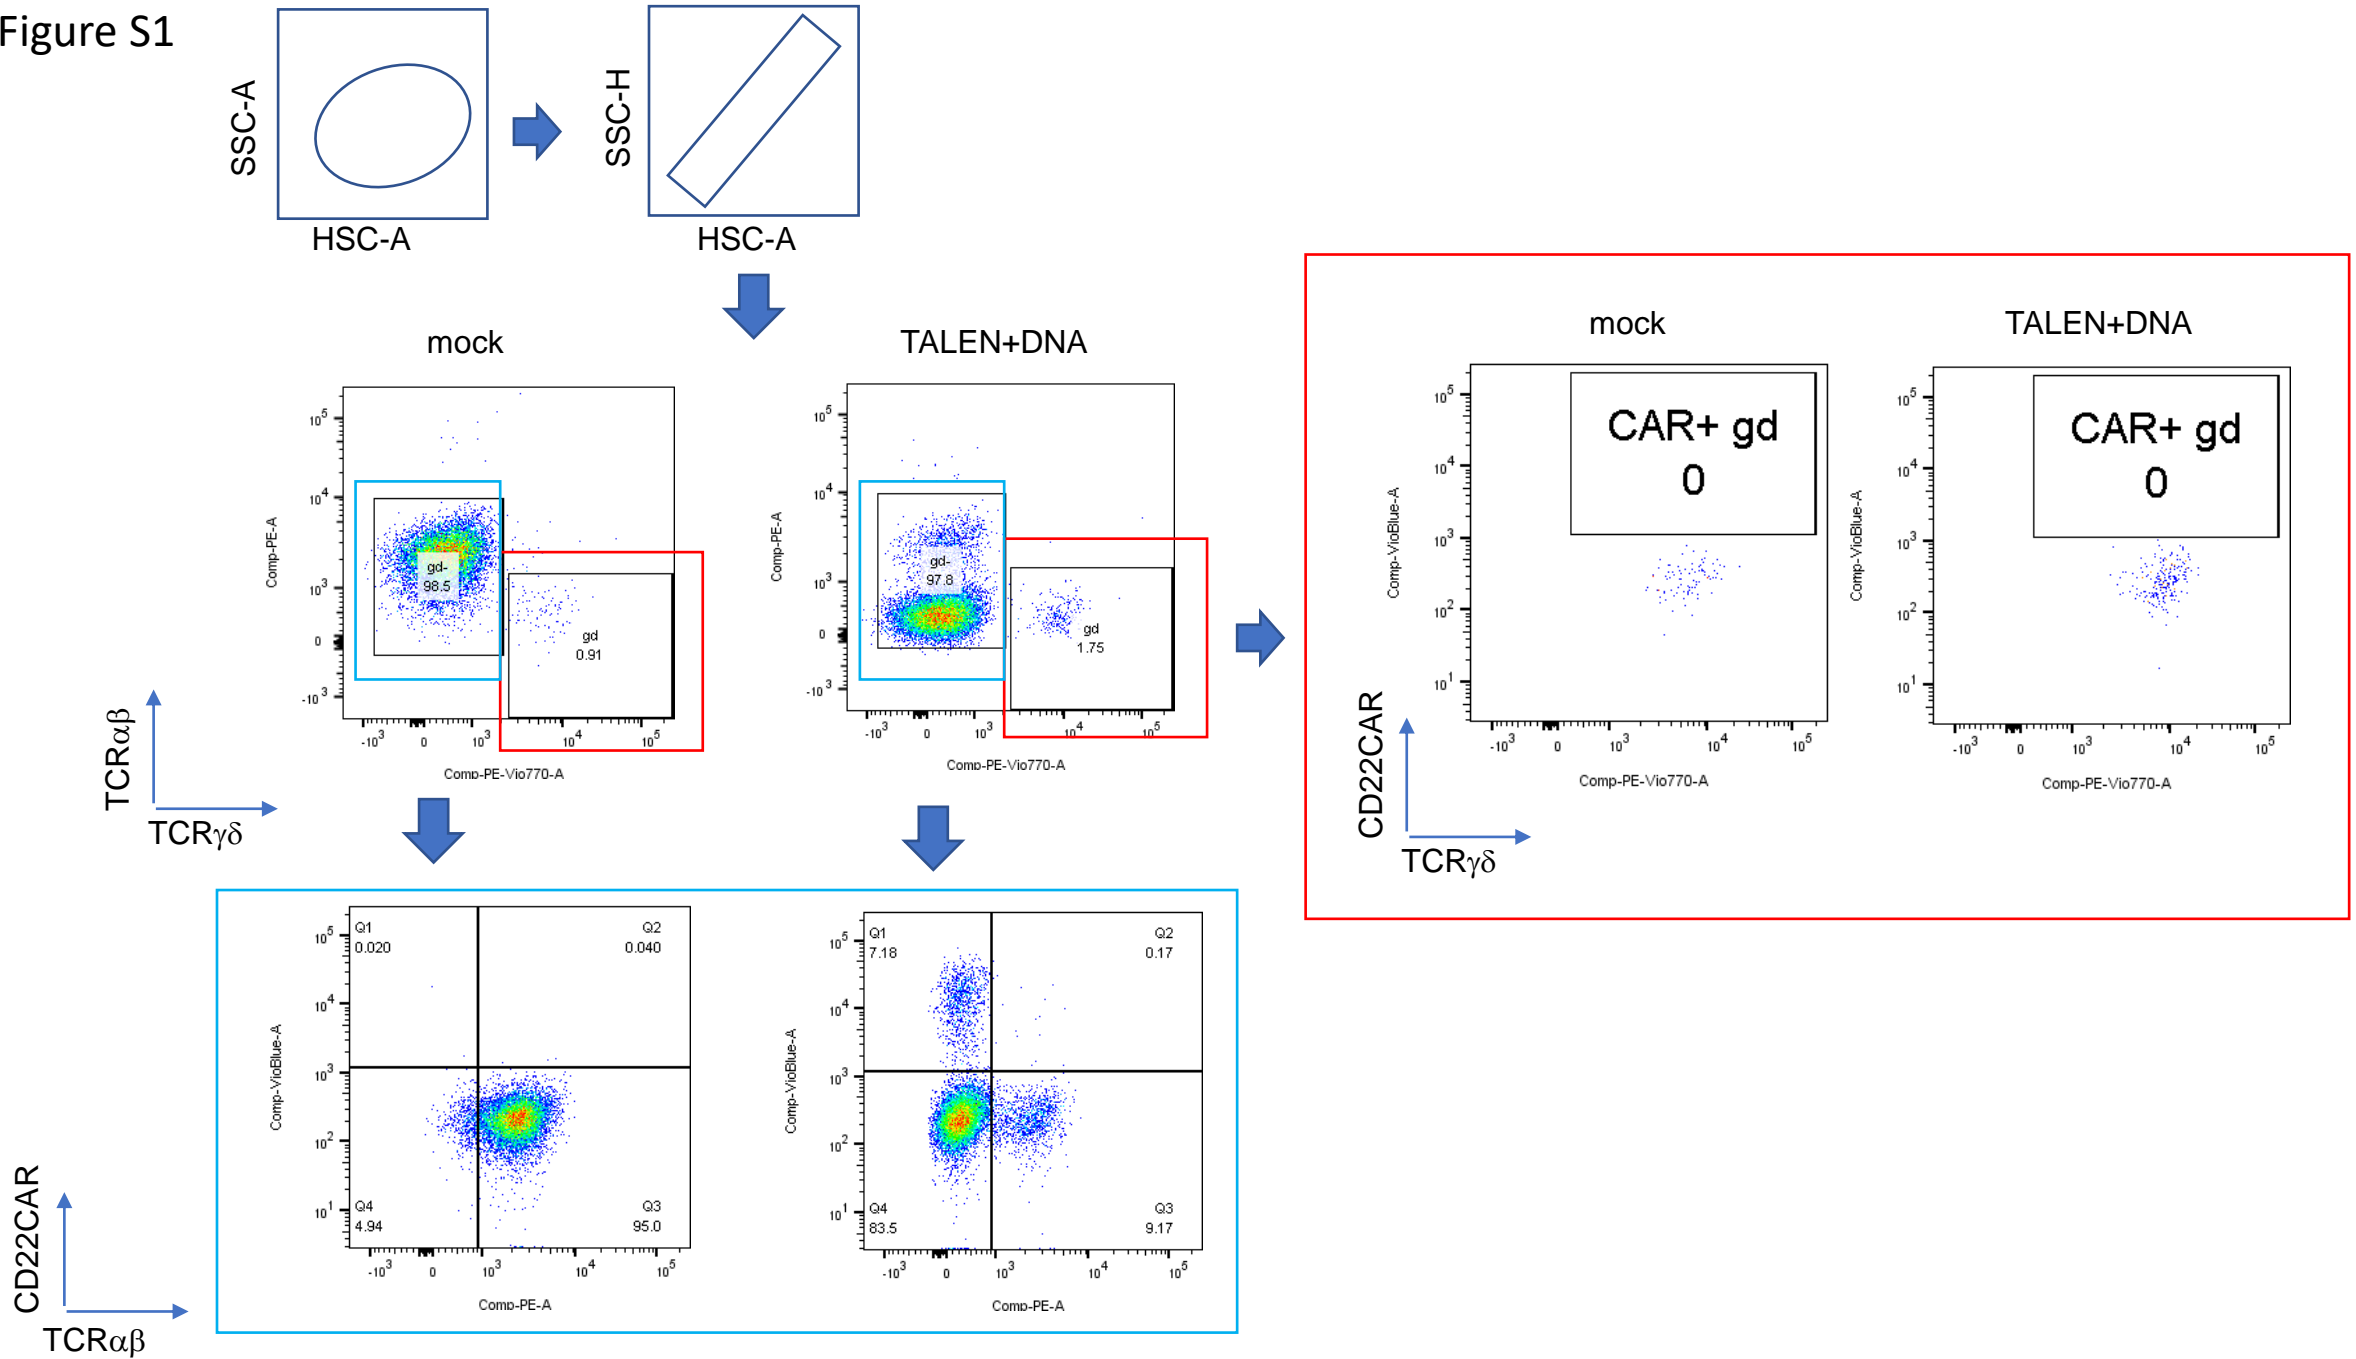

Figure S2

A

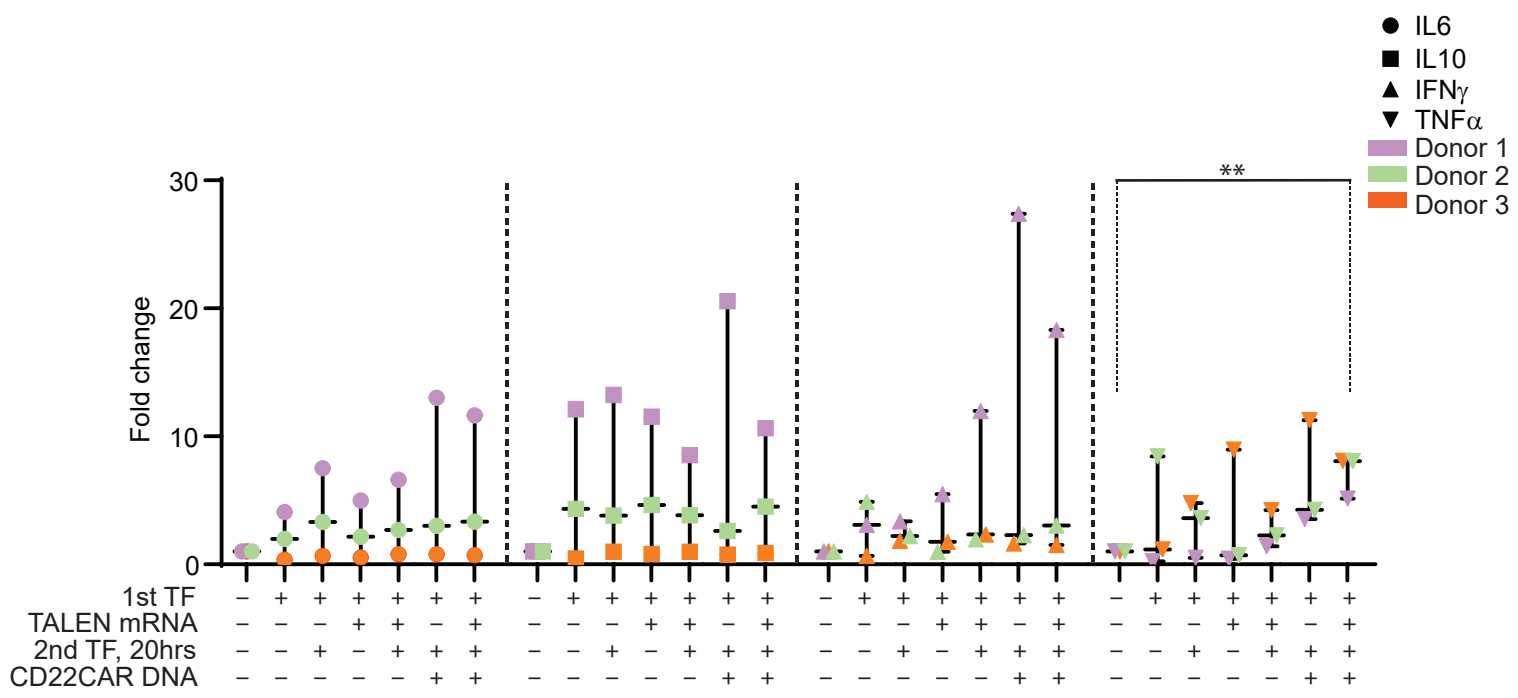

B

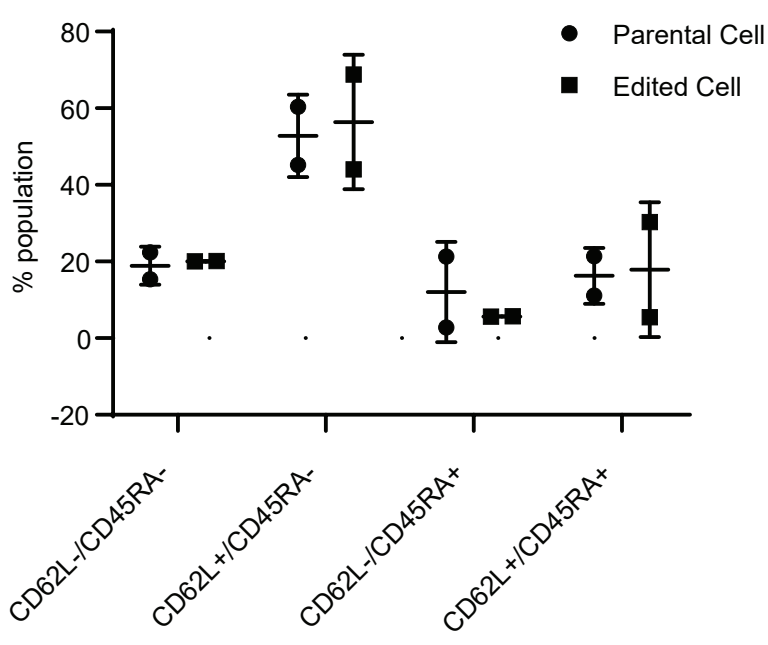

C

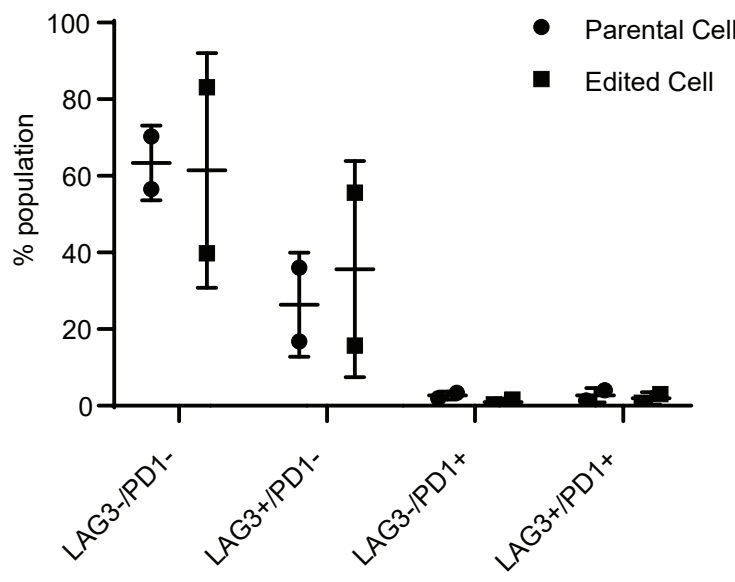

Supplement: FEB4-12-38-s001.pdf [file FEB4-12-38-s001.pdf]
